# Supplementary material for: Age-dependent contribution of domain-general networks to semantic cognition
Source: bioRxiv or medRxiv preprint supplement (doi:10.1101/2020.11.06.371153), 2021-03-02
Supplement: Supplementary file [file media-1.pdf]

**Age-dependent contribution of domain-general networks to  
semantic cognition**

—

**Supplementary Material**

## Materials and Methods

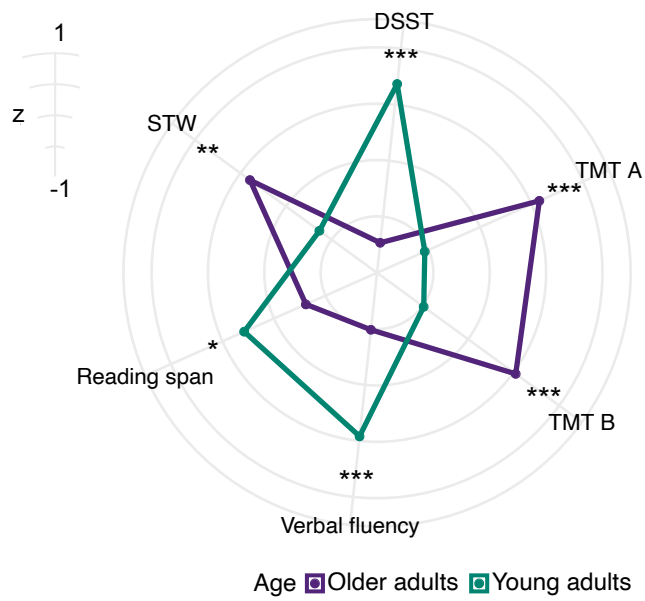

**Supplementary Figure S1. Age differences in neuropsychological tests.** STW = Spot-the-word test, DSST = Digit symbol substitution test, TMT A/B = Trail making test A/B. \*\*\*  $p < 0.001$ , \*\*  $p < 0.01$ , \*  $p < 0.05$ .

## Supplementary Results

### Behavioral Result Tables

Regression tables were generated using RStudio (R Core Team, 2018) and the package sjPlot (Lüdtke, 2020).

**Table S1.** Results for mixed-effects models for accuracy and response time.

| <i>Coefficient</i>                                         | <b>Accuracy</b> |                        |                | <b>Response time</b> |                        |                |
|------------------------------------------------------------|-----------------|------------------------|----------------|----------------------|------------------------|----------------|
|                                                            | <i>Log-Odds</i> | <i>Conf. Int (95%)</i> | <i>p</i>       | <i>Estimates</i>     | <i>Conf. Int (95%)</i> | <i>p</i>       |
| Intercept                                                  | 6.28            | 5.28 – 7.28            | < <b>0.001</b> | 6.45                 | 6.41 – 6.49            | < <b>0.001</b> |
| Age                                                        | -3.82           | -5.66 – -1.97          | 0.662          | 0.02                 | 0.01 – 0.03            | < <b>0.001</b> |
| Condition                                                  | -6.47           | -8.44 – -4.50          | < <b>0.001</b> | 0.17                 | 0.13 – 0.22            | < <b>0.001</b> |
| Difficulty                                                 | 4.63            | 2.67 – 6.59            | < <b>0.001</b> | -0.06                | -0.11 – -0.01          | < <b>0.001</b> |
| Age *<br>Condition                                         | 7.26            | 3.57 – 10.94           | 0.162          | 0.08                 | 0.06 – 0.09            | < <b>0.001</b> |
| Age *<br>Difficulty                                        | -7.99           | -11.64 – -4.34         | <b>0.002</b>   | 0.00                 | -0.01 – 0.02           | 0.7            |
| Condition *<br>Difficulty                                  | -5.03           | -8.94 – -1.11          | 0.049          | -0.10                | -0.19 – -0.00          | 0.056          |
| Age *<br>Condition *<br>Difficulty                         | 14.94           | 7.67 – 22.21           | <b>0.002</b>   | 0.03                 | -0.00 – 0.07           | 0.091          |
| <b>Random Effects</b>                                      |                 |                        |                |                      |                        |                |
| $\sigma^2$                                                 | 3.29            |                        |                | 0.10                 |                        |                |
| $\tau_{00}$                                                | 0.19            | Subj                   |                | 0.01                 | Subj                   |                |
|                                                            | 0.22            | Category               |                | 0.00                 | Category               |                |
| ICC                                                        | 0.11            |                        |                | 0.08                 |                        |                |
| N                                                          | 58              | Subj                   |                | 58                   | Subj                   |                |
|                                                            | 22              | Category               |                | 22                   | Category               |                |
| Observations                                               | 19710           |                        |                | 19491                |                        |                |
| Marginal R <sup>2</sup> /<br>Conditional<br>R <sup>2</sup> | 0.900 / 0.911   |                        |                | 0.079 / 0.156        |                        |                |

Significant effects are marked in bold. Contrasts are sum coded. P-values were obtained via likelihood ratio tests. Conf. Int. Confidence interval.

Behavioral Results

**Table S2.** Results of post-hoc tests for three-way interaction Age x Condition x Difficulty for accuracy model. P-values are Bonferroni-corrected.

| Contrast                          | Condition  | Odds ratio     | SE              | df  | Conf. Int (95%)            | z     | p              |
|-----------------------------------|------------|----------------|-----------------|-----|----------------------------|-------|----------------|
| OA Easy /<br>YA Easy              | Categories | 0.64           | 0.13            | Inf | 0.38 – 1.08                | -2.26 | 0.145          |
| OA Easy /<br>OA Difficult         | Categories | 6.41           | 1.69            | Inf | 3.20 – 12.83               | 7.06  | < <b>0.001</b> |
| OA Easy /<br>YA Difficult         | Categories | 6.91           | 1.81            | Inf | 3.46 – 13.80               | 7.36  | < <b>0.001</b> |
| YA Easy /<br>OA Difficult         | Categories | 10.02          | 2.76            | Inf | 4.85 – 20.71               | 8.38  | < <b>0.001</b> |
| YA Easy /<br>YA Difficult         | Categories | 10.79          | 2.95            | Inf | 5.25 – 22.21               | 8.7   | < <b>0.001</b> |
| OA Difficult<br>/ YA<br>Difficult | Categories | 1.08           | 0.09            | Inf | 0.86 – 1.35                | 0.86  | 1              |
| OA Easy /<br>YA Easy              | Counting   | 0.00           | 0.00            | Inf | 0.00 – 0.00                | -4.1  | < <b>0.001</b> |
| OA Easy /<br>OA Difficult         | Counting   | 0.56           | 0.46            | Inf | 0.06 – 4.99                | -0.71 | 1              |
| OA Easy /<br>YA Difficult         | Counting   | 0.74           | 0.59            | Inf | 0.09 – 6.12                | -0.38 | 1              |
| YA Easy /<br>OA Difficult         | Counting   | 2167280.4<br>9 | 81960<br>77.90  | Inf | 100.66 –<br>46660808797.59 | 3.86  | < <b>0.001</b> |
| YA Easy /<br>YA Difficult         | Counting   | 2884921.6<br>4 | 10821<br>337.03 | Inf | 145.32 –<br>57273715280.44 | 3.97  | < <b>0.001</b> |
| OA Difficult<br>/ YA<br>Difficult | Counting   | 1.33           | 0.69            | Inf | 0.34 – 5.21                | 0.55  | 1              |

Significant effects are marked in bold. SE standard error; df degrees of freedom; Conf. Int confidence interval.

Behavioral Results

**Table S3.** Results of post-hoc tests for three-way interaction Age x Condition x Difficulty for response time model. P-values are Bonferroni-corrected.

| <b>Contrast</b>                   | <b>Condition</b> | <b>Ratio</b> | <b>SE</b> | <b>df</b> | <b>Conf. Int (95%)</b> | <b>z</b> | <b>p</b>       |
|-----------------------------------|------------------|--------------|-----------|-----------|------------------------|----------|----------------|
| OA Easy /<br>YA Easy              | Categories       | 1.07         | 0.01      | Inf       | 1.04 – 1.1             | 7.33     | < <b>0.001</b> |
| OA Easy /<br>OA Difficult         | Categories       | 0.91         | 0.02      | Inf       | 0.87 – 0.95            | -5.69    | < <b>0.001</b> |
| OA Easy /<br>YA Difficult         | Categories       | 0.95         | 0.02      | Inf       | 0.91 – 0.99            | -2.94    | <b>0.019</b>   |
| YA Easy /<br>OA Difficult         | Categories       | 0.85         | 0.01      | Inf       | 0.81 – 0.89            | -9.60    | < <b>0.001</b> |
| YA Easy /<br>YA Difficult         | Categories       | 0.89         | 0.02      | Inf       | 0.85 – 0.93            | -6.90    | < <b>0.001</b> |
| OA Difficult<br>/ YA<br>Difficult | Categories       | 1.05         | 0.01      | Inf       | 1.02 – 1.07            | 5.22     | < <b>0.001</b> |
| OA Easy /<br>YA Easy              | Counting         | 0.98         | 0.01      | Inf       | 0.95 – 1               | -2.61    | 0.054          |
| OA Easy /<br>OA Difficult         | Counting         | 0.98         | 0.05      | Inf       | 0.87 – 1.11            | -0.32    | 1              |
| OA Easy /<br>YA Difficult         | Counting         | 0.97         | 0.05      | Inf       | 0.86 – 1.1             | -0.58    | 1              |
| YA Easy /<br>OA Difficult         | Counting         | 1.01         | 0.05      | Inf       | 0.89 – 1.14            | 0.18     | 1              |
| YA Easy /<br>YA Difficult         | Counting         | 1            | 0.05      | Inf       | 0.88 – 1.13            | -0.08    | 1              |
| OA Difficult<br>/ YA<br>Difficult | Counting         | 0.99         | 0.01      | Inf       | 0.96 – 1.01            | -1.32    | 1              |

Significant effects are marked in bold. SE standard error; df degrees of freedom; Conf. Int confidence interval.

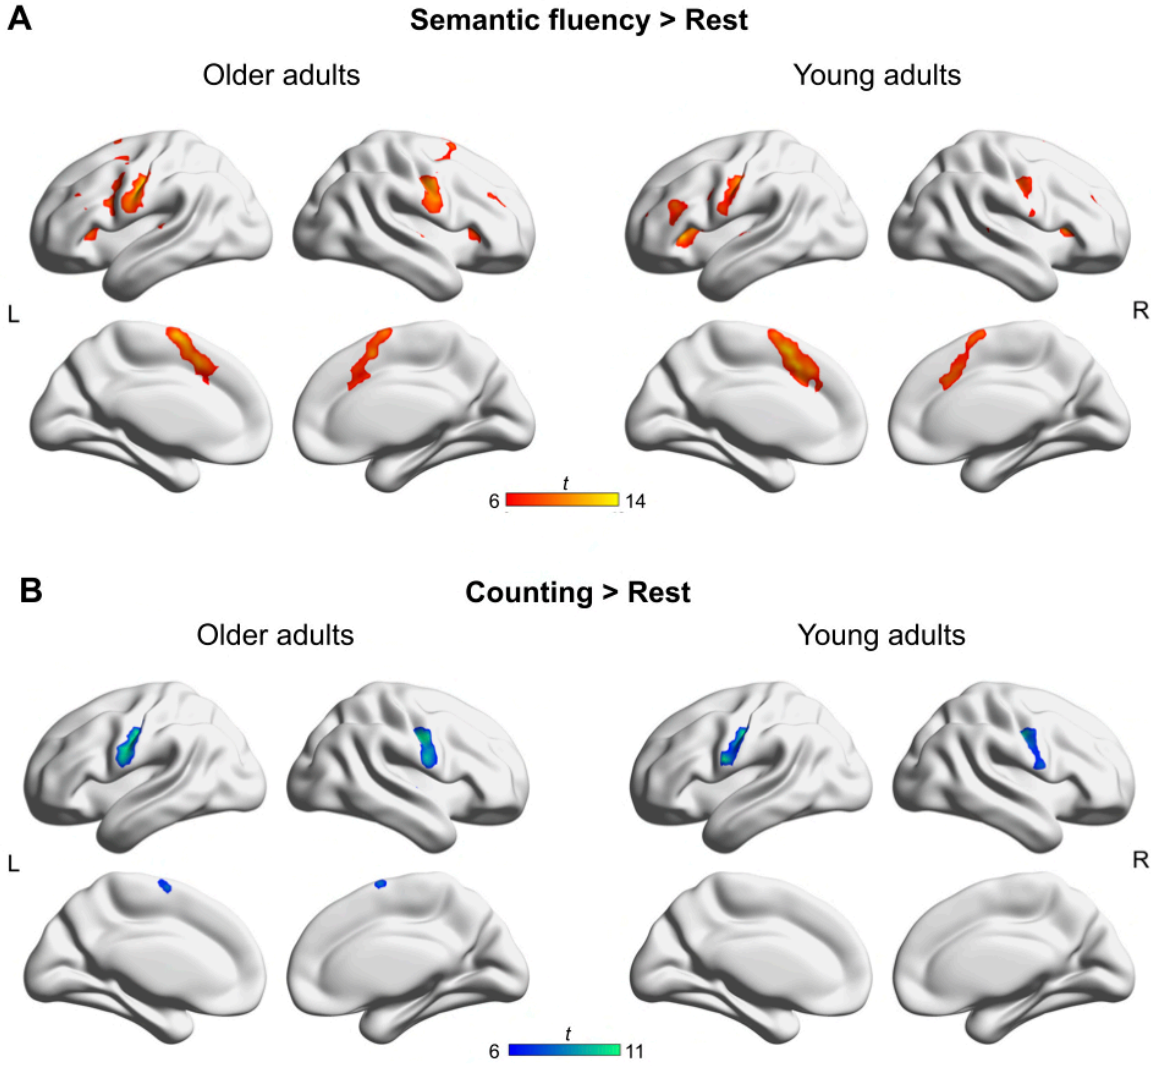

**Supplementary Figure S2. Functional MRI results for main effects of tasks from univariate analyses for each age group.** Results are FWE-corrected at  $p < 0.05$  at peak-level with a minimum cluster size = 20 voxel. Unthresholded statistical maps are available at <https://neurovault.org/collections/9072/>.

**Functional MRI Activation Tables – within-group comparisons**

All X, Y, and Z coordinates are in Montreal Neurological Institute (MNI) atlas space. Cluster size (k) is given in mm<sup>3</sup>.

**Table S4.** Older adults: Semantic fluency > Rest.

| <b>Anatomical structure</b>            | <b>Hemi</b> | <b>k</b>   | <b>t</b>     | <b>x</b>   | <b>y</b>   | <b>z</b>   |
|----------------------------------------|-------------|------------|--------------|------------|------------|------------|
| <b>Postcentral gyrus</b>               | <b>L</b>    | <b>899</b> | <b>14.26</b> | <b>-46</b> | <b>-10</b> | <b>35</b>  |
| Postcentral gyrus                      | L           |            | 12.75        | -56        | -8         | 29         |
| Postcentral gyrus                      | L           |            | 12.01        | -51        | -13        | 46         |
| Postcentral gyrus                      | L           |            | 11.13        | -61        | 0          | 24         |
| <b>Cerebellum</b>                      | <b>L</b>    | <b>407</b> | <b>13.28</b> | <b>-34</b> | <b>-57</b> | <b>-26</b> |
| Cerebellum                             | L           |            | 11.9         | -16        | -62        | -15        |
| Cerebellum                             | L           |            | 9.27         | -14        | -60        | -23        |
| Cerebellum                             | L           |            | 9            | -16        | -75        | -20        |
| <b>Supplementary motor cortex</b>      | <b>L</b>    | <b>878</b> | <b>13.11</b> | <b>-4</b>  | <b>2</b>   | <b>62</b>  |
| Supplementary motor cortex             | R           |            | 12.98        | 4          | 0          | 68         |
| Supplementary motor cortex             | L           |            | 11.61        | -9         | 7          | 57         |
| Superior frontal gyrus                 | R           |            | 11.5         | 11         | 5          | 62         |
| <b>Postcentral gyrus</b>               | <b>R</b>    | <b>370</b> | <b>12</b>    | <b>53</b>  | <b>-5</b>  | <b>26</b>  |
| Precentral gyrus                       | R           |            | 11.77        | 51         | -5         | 35         |
| Postcentral gyrus                      | R           |            | 8.46         | 66         | -3         | 18         |
| <b>Caudate nucleus</b>                 | <b>R</b>    | <b>86</b>  | <b>11.63</b> | <b>18</b>  | <b>2</b>   | <b>24</b>  |
| Caudate nucleus                        | R           |            | 9.59         | 16         | -8         | 21         |
| Caudate nucleus                        | R           |            | 8.72         | 11         | 0          | 10         |
| <b>Cerebellum</b>                      | <b>R</b>    | <b>571</b> | <b>11.58</b> | <b>31</b>  | <b>-65</b> | <b>-26</b> |
| Cerebellum                             | R           |            | 9.98         | 28         | -67        | -56        |
| Cerebellum                             | R           |            | 9.14         | 21         | -72        | -53        |
| Cerebellum                             | R           |            | 8.97         | 36         | -55        | -50        |
| <b>Middle frontal gyrus</b>            | <b>R</b>    | <b>163</b> | <b>11.36</b> | <b>36</b>  | <b>47</b>  | <b>26</b>  |
| Middle frontal gyrus                   | R           |            | 9.23         | 41         | 35         | 29         |
| Middle frontal gyrus                   | R           |            | 7.43         | 26         | 35         | 26         |
| Middle frontal gyrus                   | R           |            | 7.28         | 36         | 42         | 18         |
| <b>Insula</b>                          | <b>L</b>    | <b>122</b> | <b>9.92</b>  | <b>-31</b> | <b>27</b>  | <b>4</b>   |
| Insula                                 | L           |            | 8.09         | -31        | 15         | 7          |
| Inferior frontal gyrus, pars orbitalis | L           |            | 7.92         | -44        | 37         | -9         |
| <b>Insula</b>                          | <b>R</b>    | <b>148</b> | <b>9.91</b>  | <b>31</b>  | <b>27</b>  | <b>2</b>   |
| Insula                                 | R           |            | 8.77         | 43         | 20         | 2          |
| Inferior frontal gyrus, pars orbitalis | R           |            | 6.47         | 38         | 32         | -6         |
| <b>Superior temporal gyrus</b>         | <b>R</b>    | <b>78</b>  | <b>9.76</b>  | <b>63</b>  | <b>-3</b>  | <b>2</b>   |
| Superior temporal gyrus                | R           |            | 8.24         | 56         | -13        | 2          |
| Superior temporal gyrus                | R           |            | 7.49         | 68         | -15        | 2          |

Functional MRI Results – within-group comparisons

|                                                  |          |           |             |            |            |           |
|--------------------------------------------------|----------|-----------|-------------|------------|------------|-----------|
| Superior temporal gyrus                          | R        |           | 7.06        | 51         | -18        | 7         |
| <b>Caudate nucleus</b>                           | <b>L</b> | <b>45</b> | <b>9.56</b> | <b>-16</b> | <b>-10</b> | <b>24</b> |
| Caudate nucleus                                  | L        |           | 9.11        | -14        | -5         | 16        |
| <b>Superior parietal lobe</b>                    | <b>L</b> | <b>98</b> | <b>9.33</b> | <b>-19</b> | <b>-60</b> | <b>48</b> |
| Inferior parietal sulcus                         | L        |           | 8.5         | -26        | -45        | 38        |
| Inferior parietal lobe                           | L        |           | 7.99        | -26        | -55        | 38        |
| Inferior parietal lobe                           | L        |           | 7.77        | -41        | -40        | 38        |
| <b>Superior temporal gyrus</b>                   | <b>L</b> | <b>54</b> | <b>8.72</b> | <b>-51</b> | <b>-28</b> | <b>10</b> |
| Superior temporal gyrus                          | L        |           | 7.68        | -66        | -23        | 10        |
| Superior temporal gyrus                          | L        |           | 6.7         | -41        | -32        | 10        |
| <b>Inferior frontal gyrus, pars triangularis</b> | <b>L</b> | <b>20</b> | <b>8.71</b> | <b>-36</b> | <b>40</b>  | <b>4</b>  |
| <b>Superior temporal gyrus</b>                   | <b>L</b> | <b>21</b> | <b>8.09</b> | <b>-64</b> | <b>-10</b> | <b>4</b>  |

FWE-corrected ( $p < 0.05$ ) at peak level,  $k \geq 20$  voxels.

**Table S5.** Young adults: Semantic fluency > Rest.

| Anatomical structure                     | Hemi     | <i>k</i>   | <i>t</i>     | <i>x</i>   | <i>y</i>   | <i>z</i>   |
|------------------------------------------|----------|------------|--------------|------------|------------|------------|
| <b>Presupplementary motor cortex</b>     | <b>L</b> | <b>767</b> | <b>15.05</b> | <b>-4</b>  | <b>12</b>  | <b>51</b>  |
| Supplementary motor cortex               | L        |            | 13.89        | -6         | 17         | 43         |
| Supplementary motor cortex               | R        |            | 12.54        | 4          | 7          | 62         |
| Middle cingulate cortex                  | R        |            | 11.17        | 11         | 20         | 38         |
| <b>Insula</b>                            | <b>L</b> | <b>280</b> | <b>13.95</b> | <b>-34</b> | <b>27</b>  | <b>2</b>   |
| Insula                                   | L        |            | 11.74        | -31        | 20         | 7          |
| Inferior frontal gyrus, pars opercularis | L        |            | 8.61         | -46        | 10         | 7          |
| Inferior frontal gyrus, pars opercularis | L        |            | 7.01         | -49        | 17         | -4         |
| <b>Cerebellum</b>                        | <b>R</b> | <b>683</b> | <b>13.82</b> | <b>33</b>  | <b>-55</b> | <b>-31</b> |
| Cerebellum                               | R        |            | 13.01        | 43         | -60        | -28        |
| Cerebellum                               | R        |            | 11.51        | 33         | -62        | -50        |
| Cerebellum                               | R        |            | 11.24        | 26         | -67        | -48        |
| <b>Postcentral gyrus</b>                 | <b>L</b> | <b>331</b> | <b>13.74</b> | <b>-49</b> | <b>-15</b> | <b>40</b>  |
| Postcentral gyrus                        | L        |            | 10.89        | -56        | -13        | 46         |
| Postcentral gyrus                        | L        |            | 9.93         | -61        | 0          | 21         |
| Precentral gyrus                         | L        |            | 8.04         | -54        | 0          | 46         |
| <b>Cerebellum</b>                        | <b>L</b> | <b>377</b> | <b>13.18</b> | <b>-26</b> | <b>-60</b> | <b>-26</b> |
| Cerebellum                               | L        |            | 12.1         | -46        | -62        | -28        |
| <b>Insula</b>                            | <b>R</b> | <b>130</b> | <b>12.01</b> | <b>33</b>  | <b>22</b>  | <b>7</b>   |
| Inferior frontal gyrus, pars opercularis | R        |            | 9.4          | 46         | 15         | 4          |
| Insula                                   | R        |            | 9.05         | 41         | 20         | -1         |
| <b>Cerebellum</b>                        | <b>R</b> | <b>40</b>  | <b>10.86</b> | <b>1</b>   | <b>-47</b> | <b>-23</b> |



Functional MRI Results – within-group comparisons

|                                                  |          |            |              |            |            |            |
|--------------------------------------------------|----------|------------|--------------|------------|------------|------------|
| <b>Cerebellum</b>                                | <b>L</b> | <b>68</b>  | <b>10.41</b> | <b>-36</b> | <b>-60</b> | <b>-50</b> |
| <b>Precentral gyrus</b>                          | <b>R</b> | <b>208</b> | <b>10.23</b> | <b>56</b>  | <b>-3</b>  | <b>46</b>  |
| Precentral gyrus                                 | R        |            | 10.09        | 46         | -10        | 38         |
| Postcentral gyrus                                | R        |            | 8.94         | 56         | -5         | 35         |
| Rolandic operculum                               | R        |            | 7.71         | 61         | -3         | 16         |
| <b>Inferior frontal gyrus, pars triangularis</b> | <b>L</b> | <b>208</b> | <b>9.99</b>  | <b>-44</b> | <b>32</b>  | <b>24</b>  |
| Inferior frontal gyrus, pars triangularis        | L        |            | 8.29         | -51        | 30         | 21         |
| Inferior frontal gyrus, pars triangularis        | L        |            | 8.13         | -39        | 35         | 7          |
| Inferior frontal gyrus, pars triangularis        | L        |            | 7.96         | -51        | 35         | 10         |
| <b>Thalamus</b>                                  | <b>L</b> | <b>57</b>  | <b>9.31</b>  | <b>-11</b> | <b>-5</b>  | <b>13</b>  |
| Caudate nucleus                                  | L        |            | 9.2          | -16        | -3         | 21         |
| <b>Inferior frontal gyrus, pars opercularis</b>  | <b>L</b> | <b>98</b>  | <b>8.33</b>  | <b>-39</b> | <b>2</b>   | <b>26</b>  |
| Precentral gyrus                                 | L        |            | 7.6          | -46        | 10         | 32         |
| Precentral gyrus                                 | L        |            | 7.16         | -41        | 0          | 38         |
| Inferior frontal gyrus, pars triangularis        | L        |            | 6.5          | -46        | 15         | 24         |
| <b>Middle frontal gyrus</b>                      | <b>R</b> | <b>81</b>  | <b>8.1</b>   | <b>33</b>  | <b>47</b>  | <b>32</b>  |
| Middle frontal gyrus                             | R        |            | 7.08         | 31         | 47         | 24         |
| <b>Caudate nucleus</b>                           | <b>R</b> | <b>43</b>  | <b>8.09</b>  | <b>18</b>  | <b>5</b>   | <b>21</b>  |
| Caudate nucleus                                  | R        |            | 7.75         | 16         | -3         | 24         |
| Caudate nucleus                                  | R        |            | 7.73         | 18         | 12         | 16         |
| <b>Middle frontal gyrus</b>                      | <b>L</b> | <b>26</b>  | <b>7.57</b>  | <b>-34</b> | <b>55</b>  | <b>21</b>  |
| <b>Superior temporal gyrus</b>                   | <b>R</b> | <b>21</b>  | <b>7.5</b>   | <b>66</b>  | <b>-30</b> | <b>7</b>   |
| Superior temporal gyrus                          | R        |            | 6.7          | 56         | -30        | 4          |
| <b>Superior temporal gyrus</b>                   | <b>L</b> | <b>20</b>  | <b>6.74</b>  | <b>-59</b> | <b>-15</b> | <b>4</b>   |

FWE-corrected ( $p < 0.05$ ) at peak level,  $k \geq 20$  voxels.

**Table S6.** Older adults: Counting > Rest.

| <b>Anatomical structure</b>       | <b>Hemi</b> | <b><i>k</i></b> | <b><i>t</i></b> | <b><i>x</i></b> | <b><i>y</i></b> | <b><i>z</i></b> |
|-----------------------------------|-------------|-----------------|-----------------|-----------------|-----------------|-----------------|
| <b>Postcentral gyrus</b>          | <b>L</b>    | <b>347</b>      | <b>11.69</b>    | <b>-46</b>      | <b>-13</b>      | <b>38</b>       |
| Postcentral gyrus                 | L           |                 | 11.56           | -61             | -3              | 24              |
| Postcentral gyrus                 | L           |                 | 11.52           | -51             | -13             | 46              |
| Postcentral gyrus                 | L           |                 | 11.05           | -56             | -8              | 29              |
| <b>Postcentral gyrus</b>          | <b>R</b>    | <b>342</b>      | <b>11.43</b>    | <b>48</b>       | <b>-8</b>       | <b>35</b>       |
| Postcentral gyrus                 | R           |                 | 10.71           | 53              | -3              | 24              |
| Postcentral gyrus                 | R           |                 | 9.39            | 63              | -3              | 18              |
| <b>Supplementary motor cortex</b> | <b>L</b>    | <b>57</b>       | <b>10.16</b>    | <b>-4</b>       | <b>-5</b>       | <b>70</b>       |
| <b>Supplementary motor cortex</b> | <b>R</b>    | <b>59</b>       | <b>9.96</b>     | <b>4</b>        | <b>0</b>        | <b>68</b>       |

Functional MRI Results – within-group comparisons

|                                |          |           |             |            |            |            |
|--------------------------------|----------|-----------|-------------|------------|------------|------------|
| <b>Cerebellum</b>              | <b>L</b> | <b>52</b> | <b>9.35</b> | <b>-29</b> | <b>-62</b> | <b>-23</b> |
| Cerebellum                     | L        |           | 7.84        | -16        | -65        | -18        |
| <b>Superior temporal gyrus</b> | <b>R</b> | <b>49</b> | <b>8.44</b> | <b>66</b>  | <b>-10</b> | <b>2</b>   |
| Superior temporal gyrus        | R        |           | 7.71        | 63         | 2          | -1         |
| Superior temporal gyrus        | R        |           | 6.96        | 68         | -18        | 4          |
| Superior temporal gyrus        | R        |           | 6.76        | 53         | -15        | 4          |
| <b>Superior temporal gyrus</b> | <b>L</b> | <b>46</b> | <b>8.4</b>  | <b>-46</b> | <b>-42</b> | <b>21</b>  |
| Superior temporal gyrus        | L        |           | 6.54        | -46        | -37        | 13         |
| Superior temporal gyrus        | L        |           | 6.19        | -51        | -28        | 10         |
| <b>Cerebellum</b>              | <b>R</b> | <b>26</b> | <b>6.96</b> | <b>21</b>  | <b>-60</b> | <b>-23</b> |
| Cerebellum                     | R        |           | 6.9         | 11         | -60        | -23        |

FWE-corrected ( $p < 0.05$ ) at peak level,  $k \geq 20$  voxels.

**Table S7.** Young adults: Counting > Rest.

| <b>Anatomical structure</b> | <b>Hemi</b> | <b><i>k</i></b> | <b><i>t</i></b> | <b><i>x</i></b> | <b><i>y</i></b> | <b><i>z</i></b> |
|-----------------------------|-------------|-----------------|-----------------|-----------------|-----------------|-----------------|
| <b>Postcentral gyrus</b>    | <b>L</b>    | <b>317</b>      | <b>11.47</b>    | <b>-61</b>      | <b>0</b>        | <b>21</b>       |
| Postcentral gyrus           | L           |                 | 11.3            | -49             | -15             | 40              |
| Postcentral gyrus           | L           |                 | 9.28            | -56             | -13             | 46              |
| Postcentral gyrus           | L           |                 | 6.99            | -59             | -8              | 16              |
| <b>Precentral gyrus</b>     | <b>R</b>    | <b>247</b>      | <b>10.42</b>    | <b>46</b>       | <b>-10</b>      | <b>38</b>       |
| Precentral gyrus            | R           |                 | 9.44            | 56              | -3              | 46              |
| Rolandic operculum          | R           |                 | 9.35            | 61              | 2               | 16              |
| Postcentral gyrus           | R           |                 | 8.25            | 56              | -8              | 35              |
| <b>Cerebellum</b>           | <b>R</b>    | <b>37</b>       | <b>8.3</b>      | <b>13</b>       | <b>-60</b>      | <b>-20</b>      |
| <b>Cerebellum</b>           | <b>L</b>    | <b>25</b>       | <b>7.37</b>     | <b>-16</b>      | <b>-60</b>      | <b>-23</b>      |

FWE-corrected ( $p < 0.05$ ) at peak level,  $k \geq 20$  voxels.

**Table S8.** Older adults: Semantic fluency > Counting.

| <b>Anatomical structure</b>              | <b>Hemi</b> | <b><i>k</i></b> | <b><i>t</i></b> | <b><i>x</i></b> | <b><i>y</i></b> | <b><i>z</i></b> |
|------------------------------------------|-------------|-----------------|-----------------|-----------------|-----------------|-----------------|
| <b>Cerebellum</b>                        | <b>L</b>    | <b>1844</b>     | <b>12.99</b>    | <b>-36</b>      | <b>-62</b>      | <b>-26</b>      |
| Cerebellum                               | R           |                 | 12.59           | 28              | -62             | -26             |
| Cerebellum                               | L           |                 | 12.03           | -29             | -67             | -26             |
| Cerebellum                               | R           |                 | 11.08           | 6               | -80             | -31             |
| <b>Middle frontal gyrus</b>              | <b>L</b>    | <b>578</b>      | <b>12.9</b>     | <b>-44</b>      | <b>5</b>        | <b>35</b>       |
| Inferior frontal gyrus, pars opercularis | L           |                 | 11.2            | -41             | 15              | 21              |
| Precentral gyrus                         | L           |                 | 10.7            | -39             | 2               | 24              |
| Middle frontal gyrus                     | L           |                 | 8.94            | -46             | 7               | 46              |
| <b>Superior frontal gyrus (preSMA)</b>   | <b>L</b>    | <b>661</b>      | <b>12.02</b>    | <b>-9</b>       | <b>15</b>       | <b>51</b>       |
| Presupplementary motor cortex            | L           |                 | 11.62           | -9              | 20              | 43              |
| Superior frontal gyrus                   | L           |                 | 10.34           | -1              | 10              | 60              |

Functional MRI Results – within-group comparisons

|                                           |          |            |              |            |            |           |
|-------------------------------------------|----------|------------|--------------|------------|------------|-----------|
| Superior frontal gyrus                    | R        |            | 9.34         | 8          | 15         | 48        |
| <b>Insula</b>                             | <b>L</b> | <b>269</b> | <b>10.98</b> | <b>-31</b> | <b>25</b>  | <b>4</b>  |
| Caudate nucleus                           | L        |            | 10.84        | -16        | 0          | 16        |
| Caudate nucleus                           | L        |            | 9.52         | -16        | -10        | 21        |
| Superior frontal gyrus                    | L        |            | 8.74         | -19        | 10         | 4         |
| <b>Insula</b>                             | <b>R</b> | <b>113</b> | <b>10.95</b> | <b>31</b>  | <b>27</b>  | <b>2</b>  |
| Inferior frontal gyrus. pars triangularis | R        |            | 7.25         | 48         | 22         | -4        |
| Frontal operculum                         | R        |            | 7.08         | 43         | 20         | 4         |
| <b>Caudate nucleus</b>                    | <b>R</b> | <b>106</b> | <b>9.96</b>  | <b>18</b>  | <b>15</b>  | <b>18</b> |
| Caudate nucleus                           | R        |            | 9.53         | 18         | -8         | 21        |
| Caudate nucleus                           | R        |            | 8.67         | 16         | 0          | 18        |
| Thalamus                                  | R        |            | 8.22         | 11         | 0          | 10        |
| <b>Middle frontal gyrus</b>               | <b>R</b> | <b>36</b>  | <b>9.79</b>  | <b>43</b>  | <b>35</b>  | <b>32</b> |
| <b>Superior frontal gyrus</b>             | <b>L</b> | <b>100</b> | <b>9.12</b>  | <b>-21</b> | <b>12</b>  | <b>54</b> |
| Middle frontal gyrus                      | L        |            | 6.82         | -21        | -3         | 60        |
| Middle frontal gyrus                      | L        |            | 6.57         | -24        | 20         | 51        |
| <b>Intracalcarine cortex</b>              | <b>R</b> | <b>43</b>  | <b>9.01</b>  | <b>18</b>  | <b>-80</b> | <b>7</b>  |
| Occipital pole                            | R        |            | 7.93         | 13         | -95        | 10        |
| Intracalcarine cortex                     | R        |            | 6.77         | 13         | -77        | 16        |
| <b>Angular gyrus</b>                      | <b>L</b> | <b>27</b>  | <b>8.1</b>   | <b>-34</b> | <b>-72</b> | <b>43</b> |
| <b>Middle frontal gyrus</b>               | <b>L</b> | <b>24</b>  | <b>8.07</b>  | <b>-34</b> | <b>0</b>   | <b>57</b> |
| <b>Superior parietal lobe</b>             | <b>L</b> | <b>61</b>  | <b>7.65</b>  | <b>-14</b> | <b>-65</b> | <b>51</b> |
| Superior parietal lobe                    | L        |            | 7.31         | -21        | -65        | 60        |
| Angular gyrus                             | L        |            | 6.65         | -29        | -62        | 46        |
| <b>Intracalcarine cortex</b>              | <b>L</b> | <b>71</b>  | <b>7.52</b>  | <b>-11</b> | <b>-72</b> | <b>10</b> |
| Intracalcarine cortex                     | L        |            | 7.24         | -6         | -87        | 2         |
| Intracalcarine cortex                     | L        |            | 6.96         | -4         | -82        | 10        |
| <b>Middle frontal gyrus</b>               | <b>R</b> | <b>21</b>  | <b>7.39</b>  | <b>23</b>  | <b>60</b>  | <b>-4</b> |
| Middle frontal gyrus                      | R        |            | 7.05         | 31         | 57         | -9        |
| <b>Thalamus</b>                           | <b>L</b> | <b>21</b>  | <b>6.99</b>  | <b>-4</b>  | <b>-5</b>  | <b>10</b> |

FWE-corrected ( $p < 0.05$ ) at peak level,  $k \geq 20$  voxels.

**Table S9.** Young adults: Semantic fluency > Counting.

| Anatomical structure          | Hemi     | <i>k</i>    | <i>t</i>     | <i>x</i>   | <i>y</i>   | <i>z</i>   |
|-------------------------------|----------|-------------|--------------|------------|------------|------------|
| <b>Insula</b>                 | <b>L</b> | <b>3112</b> | <b>20.03</b> | <b>-31</b> | <b>25</b>  | <b>2</b>   |
| Presupplementary motor cortex | L        |             | 16.85        | -4         | 25         | 40         |
| Presupplementary motor cortex | L        |             | 16.33        | -6         | 12         | 51         |
| Presupplementary motor cortex | R        |             | 14.72        | 13         | 27         | 29         |
| <b>Cerebellum</b>             | <b>R</b> | <b>2970</b> | <b>19.11</b> | <b>33</b>  | <b>-57</b> | <b>-31</b> |
| Cerebellum                    | R        |             | 16.12        | 31         | -65        | -28        |
| Cerebellum                    | R        |             | 13.89        | 28         | -70        | -50        |
| Cerebellum                    | R        |             | 12.66        | 41         | -60        | -28        |

Functional MRI Results – within-group comparisons

|                                 |          |            |              |            |            |            |
|---------------------------------|----------|------------|--------------|------------|------------|------------|
| <b>Anterior cingulate gyrus</b> | <b>L</b> | <b>90</b>  | <b>14.15</b> | <b>-4</b>  | <b>2</b>   | <b>29</b>  |
| Anterior cingulate gyrus        | L        |            | 9.12         | -1         | 12         | 24         |
| Anterior cingulate gyrus        | R        |            | 8.89         | 6          | 7          | 26         |
| <b>Insula</b>                   | <b>R</b> | <b>315</b> | <b>13.32</b> | <b>31</b>  | <b>27</b>  | <b>2</b>   |
| Insula                          | R        |            | 12.64        | 38         | 20         | -4         |
| <b>Caudate nucleus</b>          | <b>L</b> | <b>235</b> | <b>12.81</b> | <b>-9</b>  | <b>5</b>   | <b>2</b>   |
| Caudate nucleus                 | L        |            | 12.02        | -16        | -3         | 21         |
| Thalamus                        | L        |            | 11.32        | -11        | -5         | 13         |
| Caudate nucleus                 | L        |            | 10.63        | -16        | 7          | 16         |
| <b>Brain stem</b>               | <b>L</b> | <b>296</b> | <b>12.46</b> | <b>-6</b>  | <b>-23</b> | <b>-18</b> |
| Thalamus                        | L        |            | 11.94        | -9         | -18        | 16         |
| Thalamus                        | L        |            | 11.85        | -4         | -23        | 10         |
| Thalamus                        | L        |            | 10.36        | -4         | -13        | 10         |
| <b>Superior parietal lobe</b>   | <b>L</b> | <b>224</b> | <b>10.49</b> | <b>-29</b> | <b>-65</b> | <b>51</b>  |
| Angular gyrus                   | L        |            | 10.21        | -29        | -72        | 43         |
| Inferior parietal lobe          | L        |            | 8.84         | -34        | -57        | 40         |
| Middle occipital gyrus          | L        |            | 6.47         | -31        | -80        | 38         |
| <b>Caudate nucleus</b>          | <b>R</b> | <b>215</b> | <b>10.45</b> | <b>18</b>  | <b>10</b>  | <b>18</b>  |
| Caudate nucleus                 | R        |            | 10.38        | 8          | 7          | 2          |
| Caudate nucleus                 | R        |            | 9.57         | 13         | 7          | 10         |
| Caudate nucleus                 | R        |            | 9.16         | 18         | -3         | 21         |
| <b>Superior temporal gyrus</b>  | <b>L</b> | <b>54</b>  | <b>9.62</b>  | <b>-61</b> | <b>-30</b> | <b>7</b>   |
| Planum temporale                | L        |            | 6.97         | -61        | -15        | 4          |
| <b>Middle frontal gyrus</b>     | <b>R</b> | <b>176</b> | <b>8.3</b>   | <b>36</b>  | <b>42</b>  | <b>32</b>  |
| Middle frontal gyrus            | R        |            | 7.56         | 31         | 55         | 26         |
| Middle frontal gyrus            | R        |            | 7.53         | 33         | 37         | 21         |
| Middle frontal gyrus            | R        |            | 7.17         | 41         | 35         | 40         |

FWE-corrected ( $p < 0.05$ ) at peak level,  $k \geq 20$  voxels.

**Table S10.** Older adults: Counting > Semantic fluency.

| <b>Anatomical structure</b> | <b>Hemi</b> | <b><i>k</i></b> | <b><i>t</i></b> | <b><i>x</i></b> | <b><i>y</i></b> | <b><i>z</i></b> |
|-----------------------------|-------------|-----------------|-----------------|-----------------|-----------------|-----------------|
| <b>Temporal pole</b>        | <b>R</b>    | <b>30</b>       | <b>9.33</b>     | <b>51</b>       | <b>12</b>       | <b>-31</b>      |
| <b>Precuneus</b>            | <b>R</b>    | <b>45</b>       | <b>7.72</b>     | <b>6</b>        | <b>-52</b>      | <b>38</b>       |

FWE-corrected ( $p < 0.05$ ) at peak level,  $k \geq 20$  voxels.

**Table S11.** Young adults: Counting > Semantic fluency (FWE-corrected).

| <b>Anatomical structure</b> | <b>Hemi</b> | <b><i>k</i></b> | <b><i>t</i></b> | <b><i>x</i></b> | <b><i>y</i></b> | <b><i>z</i></b> |
|-----------------------------|-------------|-----------------|-----------------|-----------------|-----------------|-----------------|
| <b>Temporal pole</b>        | <b>R</b>    | <b>75</b>       | <b>11.02</b>    | <b>51</b>       | <b>10</b>       | <b>-31</b>      |
| Temporal pole               | R           |                 | 6.93            | 43              | 20              | -28             |
| <b>Precuneus</b>            | <b>R</b>    | <b>312</b>      | <b>9.7</b>      | <b>8</b>        | <b>-65</b>      | <b>29</b>       |
| Precuneus                   | R           |                 | 9.59            | 11              | -52             | 35              |
| Precuneus                   | L           |                 | 9.05            | -9              | -52             | 35              |

Functional MRI Results – within-group comparisons

|                                   |          |           |             |            |            |            |
|-----------------------------------|----------|-----------|-------------|------------|------------|------------|
| <b>Insula</b>                     | <b>L</b> | <b>46</b> | <b>8.62</b> | <b>-41</b> | <b>-8</b>  | <b>-1</b>  |
| Insula                            | L        |           | 7.24        | -36        | -18        | 18         |
| Insula                            | L        |           | 7.02        | -39        | -15        | 2          |
| <b>Insula</b>                     | <b>R</b> | <b>62</b> | <b>8.48</b> | <b>36</b>  | <b>-15</b> | <b>4</b>   |
| Insula                            | R        |           | 7.66        | 41         | 0          | -6         |
| Insula                            | R        |           | 7.1         | 38         | -15        | 21         |
| <b>Middle temporal gyrus</b>      | <b>L</b> | <b>27</b> | <b>8.27</b> | <b>-56</b> | <b>2</b>   | <b>-20</b> |
| <b>Rolandic operculum</b>         | <b>R</b> | <b>22</b> | <b>8.01</b> | <b>53</b>  | <b>0</b>   | <b>10</b>  |
| <b>Posterior cingulate cortex</b> | <b>L</b> | <b>40</b> | <b>7.9</b>  | <b>-6</b>  | <b>-30</b> | <b>46</b>  |
| Precentral gyrus                  | L        |           | 6.77        | -6         | -25        | 54         |
| <b>Precentral gyrus</b>           | <b>R</b> | <b>28</b> | <b>7.42</b> | <b>1</b>   | <b>-15</b> | <b>62</b>  |
| Precentral gyrus                  | L        |           | 6.91        | -4         | -23        | 70         |

FWE-corrected ( $p < 0.05$ ) at peak level,  $k \geq 20$  voxels.

**Table S12.** Young adults: Counting > Semantic fluency ( $p < 0.001$  uncorr., FWE-corrected  $p < 0.05$  at cluster level).

| <b>Anatomical structure</b>      | <b>Hemi</b> | <b><i>k</i></b> | <b><i>t</i></b> | <b><i>x</i></b> | <b><i>y</i></b> | <b><i>z</i></b> |
|----------------------------------|-------------|-----------------|-----------------|-----------------|-----------------|-----------------|
| <b>Temporal pole</b>             | <b>R</b>    | <b>281</b>      | <b>11.02</b>    | <b>51</b>       | <b>10</b>       | <b>-31</b>      |
| Temporal pole                    | R           |                 | 6.93            | 43              | 20              | -28             |
| Middle temporal gyrus            | R           |                 | 5.93            | 61              | -8              | -12             |
| Superior temporal gyrus          | R           |                 | 4.35            | 48              | -10             | -15             |
| <b>Precuneus</b>                 | <b>R</b>    | <b>3620</b>     | <b>9.7</b>      | <b>8</b>        | <b>-65</b>      | <b>29</b>       |
| Precuneus                        | R           |                 | 9.59            | 11              | -52             | 35              |
| Precuneus                        | L           |                 | 9.05            | -9              | -52             | 35              |
| Insula                           | R           |                 | 8.48            | 36              | -15             | 4               |
| Central operculum                | R           |                 | 8.01            | 53              | 0               | 10              |
| <b>Insula</b>                    | <b>L</b>    | <b>438</b>      | <b>8.62</b>     | <b>-41</b>      | <b>-8</b>       | <b>-1</b>       |
| Insula                           | L           |                 | 7.24            | -36             | -18             | 18              |
| Insula                           | L           |                 | 7.02            | -39             | -15             | 2               |
| Precentral gyrus                 | L           |                 | 6.99            | -59             | 2               | 10              |
| Insula                           | L           |                 | 5.22            | -41             | -3              | -12             |
| <b>Middle temporal gyrus</b>     | <b>L</b>    | <b>151</b>      | <b>8.27</b>     | <b>-56</b>      | <b>2</b>        | <b>-20</b>      |
| Temporal pole                    | L           |                 | 7.06            | -54             | 10              | -31             |
| Temporal pole                    | L           |                 | 4.5             | -44             | 20              | -31             |
| Temporal pole                    | L           |                 | 3.99            | -41             | 7               | -23             |
| <b>Anterior cingulate cortex</b> | <b>L</b>    | <b>96</b>       | <b>7.36</b>     | <b>-6</b>       | <b>27</b>       | <b>-6</b>       |
| Anterior cingulate cortex        | L           |                 | 4.09            | -6              | 42              | -4              |
| <b>Angular gyrus</b>             | <b>L</b>    | <b>281</b>      | <b>7.11</b>     | <b>-54</b>      | <b>-62</b>      | <b>35</b>       |
| Angular gyrus                    | L           |                 | 5.46            | -41             | -60             | 26              |
| Middle temporal gyrus            | L           |                 | 5.05            | -46             | -62             | 18              |
| Angular gyrus                    | L           |                 | 4.46            | -46             | -75             | 35              |
| Angular gyrus                    | L           |                 | 4.03            | -49             | -67             | 43              |
| <b>Angular gyrus</b>             | <b>R</b>    | <b>389</b>      | <b>7.02</b>     | <b>51</b>       | <b>-57</b>      | <b>26</b>       |

Functional MRI Results – within-group comparisons

|                          |   |      |    |     |    |
|--------------------------|---|------|----|-----|----|
| Angular gyrus            | R | 4.6  | 46 | -65 | 48 |
| Angular gyrus            | R | 4.16 | 43 | -72 | 35 |
| Lateral occipital cortex | R | 4.1  | 46 | -77 | 26 |
| Lateral occipital cortex | R | 3.55 | 56 | -62 | 7  |

FWE-corrected ( $p < 0.05$ ) at cluster-level,  $p < 0.001$  uncorr. at peak-level.

**Table S13.** Results for linear mixed-effects model for parameter estimates from fMRI main effects.

| <i>Coefficient</i>                                   | <i>Estimates</i> | <b>Beta weights</b>    |                |
|------------------------------------------------------|------------------|------------------------|----------------|
|                                                      |                  | <i>Conf. Int (95%)</i> | <i>p</i>       |
| Intercept                                            | -0.39            | -0.54 – -0.24          | < <b>0.001</b> |
| Network                                              | 1.07             | 0.95 – 1.19            | < <b>0.001</b> |
| Age                                                  | 0.34             | 0.21 – 0.46            | < <b>0.001</b> |
| Condition                                            | 0.49             | 0.37 – 0.61            | < <b>0.001</b> |
| Network * Age                                        | -0.02            | -0.15 – 0.10           | 0.704          |
| Network * Condition                                  | 1.14             | 1.02 – 1.26            | < <b>0.001</b> |
| Age * Condition                                      | -0.02            | -0.14 – 0.10           | 0.762          |
| Network * Age * Condition                            | -0.27            | -0.39 – -0.15          | < <b>0.001</b> |
| <b>Random Effects</b>                                |                  |                        |                |
| $\sigma^2$                                           | 0.91             |                        |                |
| $\tau_{00}$ Subj                                     | 0.06             |                        |                |
| ICC                                                  | 0.06             |                        |                |
| N Subj                                               | 30               |                        |                |
| Observations                                         | 232              |                        |                |
| Marginal R <sup>2</sup> / Conditional R <sup>2</sup> | 0.751 / 0.766    |                        |                |

Significant effects are marked in bold. Contrasts are sum coded. P-values were obtained via likelihood ratio tests. Conf. Int. Confidence interval.

**Table S14.** Results for post-hoc tests for three-way interaction Network x Age x Contrast for parameter estimates model. P-values are Bonferroni-corrected.

| <b>Contrast</b>    | <b>fMRI contrast</b> | <i>Estimate</i> | <i>SE</i> | <i>df</i> | <i>Conf. Int (95%)</i> | <i>t</i> | <i>p</i>       |
|--------------------|----------------------|-----------------|-----------|-----------|------------------------|----------|----------------|
| OA MDN -<br>YA MDN | SF > rest            | 0.04            | 0.25      | 196.93    | -0.63 – 0.71           | 0.17     | 1              |
| OA MDN -<br>OA DMN | SF > rest            | 3.83            | 0.25      | 195.3     | 3.15 – 4.51            | 15.05    | < <b>0.001</b> |
| OA MDN -<br>YA DMN | SF > rest            | 5.05            | 0.25      | 196.93    | 4.38 – 5.72            | 20.18    | < <b>0.001</b> |
| YA MDN -<br>OA DMN | SF > rest            | 3.79            | 0.25      | 196.93    | 3.12 – 4.45            | 15.12    | < <b>0.001</b> |
| YA MDN -<br>YA DMN | SF > rest            | 5.01            | 0.25      | 195.3     | 4.35 – 5.66            | 20.38    | < <b>0.001</b> |
| OA DMN -<br>YA DMN | SF > rest            | 1.22            | 0.25      | 196.93    | 0.56 – 1.89            | 4.89     | < <b>0.001</b> |
| OA MDN -<br>YA MDN | Count > rest         | 1.20            | 0.25      | 196.93    | 0.54 – 1.87            | 4.81     | < <b>0.001</b> |
| OA MDN -<br>OA DMN | Count > rest         | 0.35            | 0.25      | 195.3     | -0.33 – 1.03           | 1.38     | 1              |
| OA MDN -<br>YA DMN | Count > rest         | 0.57            | 0.25      | 196.93    | -0.10 – 1.24           | 2.27     | 0.146          |
| YA MDN -<br>OA DMN | Count > rest         | -0.85           | 0.25      | 196.93    | -1.52 – -0.19          | -3.41    | <b>0.005</b>   |
| YA MDN -<br>YA DMN | Count > rest         | -0.64           | 0.25      | 195.3     | -1.29 – 0.02           | -2.59    | 0.062          |
| OA DMN -<br>YA DMN | Count > rest         | 0.22            | 0.25      | 196.93    | -0.45 – 0.89           | 0.87     | 1              |

Significant effects are marked in bold. SE standard error; df degrees of freedom; Conf. Int confidence interval.

**Table S 15.** Young adults: Easy > Difficult semantic categories.

| <b>Anatomical structure</b> | <b>Hemi</b> | <i>k</i>  | <i>t</i>    | <i>x</i>  | <i>y</i> | <i>z</i>  |
|-----------------------------|-------------|-----------|-------------|-----------|----------|-----------|
| <b>Middle frontal gyrus</b> | <b>R</b>    | <b>20</b> | <b>7.24</b> | <b>26</b> | <b>2</b> | <b>51</b> |
| Middle frontal gyrus        | R           |           | 6.49        | 31        | 12       | 51        |

FWE-corrected ( $p < 0.05$ ) at peak level,  $k \geq 20$  voxels.

**Activation Tables for Psychophysiological Interactions (PPI)**

All individual seeds for PPIs were thresholded at  $p < 0.01$ . All reported results are for the contrast Semantic fluency > Counting and are FWE-corrected at  $p < 0.05$  at peak-level ( $k \geq 20$  voxels). All X, Y, and Z coordinates are in Montreal Neurological Institute (MNI) atlas space. Cluster size ( $k$ ) is given in  $\text{mm}^3$ .

**Table S16.** PPI seed: Pre-supplementary Motor Area [-6 12 51].

| <b>Anatomical structure</b>              | <b>Hemi</b> | <b><i>k</i></b> | <b><i>t</i></b> | <b><i>x</i></b> | <b><i>y</i></b> | <b><i>z</i></b> |
|------------------------------------------|-------------|-----------------|-----------------|-----------------|-----------------|-----------------|
| <b>Older adults</b>                      |             |                 |                 |                 |                 |                 |
| No significant clusters above threshold. |             |                 |                 |                 |                 |                 |
| <b>Young adults</b>                      |             |                 |                 |                 |                 |                 |
| <b>Caudate nucleus</b>                   | <b>L</b>    | <b>92</b>       | <b>9.89</b>     | <b>-14</b>      | <b>10</b>       | <b>4</b>        |
| Caudate nucleus                          | L           |                 | 8.68            | -16             | 20              | 4               |
| Caudate nucleus                          | L           |                 | 6.18            | -11             | 7               | 13              |
| <b>Caudate nucleus</b>                   | <b>R</b>    | <b>76</b>       | <b>9.19</b>     | <b>8</b>        | <b>12</b>       | <b>2</b>        |
| Caudate nucleus                          | R           |                 | 7.72            | 18              | 22              | -4              |
| Putamen                                  | R           |                 | 7.30            | 18              | 12              | -1              |
| Caudate nucleus                          | R           |                 | 6.93            | 18              | 25              | 4               |
| <b>Precuneus</b>                         | <b>L</b>    | <b>125</b>      | <b>8.31</b>     | <b>-6</b>       | <b>-52</b>      | <b>16</b>       |
| Posterior cingulate cortex               | L           |                 | 7.60            | -4              | -55             | 26              |
| Precuneus                                | L           |                 | 7.44            | -11             | -55             | 7               |
| <b>Thalamus</b>                          | <b>L</b>    | <b>35</b>       | <b>7.30</b>     | <b>-1</b>       | <b>-13</b>      | <b>7</b>        |
| Thalamus                                 | R           |                 | 7.29            | 4               | -20             | 10              |
| Thalamus                                 | L           |                 | 6.50            | -9              | -25             | 13              |

**Table S17.** PPI seed: Left Insula [-31 25 2].

| <b>Anatomical structure</b>              | <b>Hemi</b> | <b><i>k</i></b> | <b><i>t</i></b> | <b><i>x</i></b> | <b><i>y</i></b> | <b><i>z</i></b> |
|------------------------------------------|-------------|-----------------|-----------------|-----------------|-----------------|-----------------|
| <b>Older adults</b>                      |             |                 |                 |                 |                 |                 |
| No significant clusters above threshold. |             |                 |                 |                 |                 |                 |
| <b>Young adults</b>                      |             |                 |                 |                 |                 |                 |
| <b>Caudate nucleus</b>                   | <b>R</b>    | <b>36</b>       | <b>10.09</b>    | <b>8</b>        | <b>12</b>       | <b>2</b>        |
| <b>Caudate nucleus</b>                   | <b>L</b>    | <b>34</b>       | <b>7.04</b>     | <b>-14</b>      | <b>12</b>       | <b>4</b>        |
| Caudate nucleus                          | L           |                 | 6.33            | -16             | 22              | 2               |
| <b>Precuneus</b>                         | <b>L</b>    | <b>31</b>       | <b>6.88</b>     | <b>-9</b>       | <b>-60</b>      | <b>7</b>        |
| Precuneus                                | L           |                 | 6.75            | -6              | -52             | 16              |

**Table S18.** PPI seed: Right Insula [31 27 2].

| <b>Anatomical structure</b> | <b>Hemi</b> | <b><i>k</i></b> | <b><i>t</i></b> | <b><i>x</i></b> | <b><i>y</i></b> | <b><i>z</i></b> |
|-----------------------------|-------------|-----------------|-----------------|-----------------|-----------------|-----------------|
| <b>Older adults</b>         |             |                 |                 |                 |                 |                 |



Functional Connectivity Results

|                                               |          |           |             |            |            |            |
|-----------------------------------------------|----------|-----------|-------------|------------|------------|------------|
| <b>Precuneus</b>                              | <b>R</b> | <b>29</b> | <b>8.92</b> | <b>1</b>   | <b>-60</b> | <b>26</b>  |
| Posterior cingulate gyrus                     | L        |           | 8.56        | -1         | -45        | 26         |
| <b>Inferior frontal gyrus, pars orbitalis</b> | <b>L</b> | <b>20</b> | <b>7.39</b> | <b>-31</b> | <b>35</b>  | <b>-15</b> |
| Inferior frontal gyrus, pars orbitalis        | L        |           | 6.46        | -44        | 30         | -12        |
| <b>Young adults</b>                           |          |           |             |            |            |            |
| No significant clusters above threshold.      |          |           |             |            |            |            |

**Table S19.** PPI seed: Right Temporal Pole [48 15 -31].

| Anatomical structure                            | Hemi     | <i>k</i>  | <i>t</i>    | <i>x</i>  | <i>y</i>   | <i>z</i>  |
|-------------------------------------------------|----------|-----------|-------------|-----------|------------|-----------|
| <b>Older adults</b>                             |          |           |             |           |            |           |
| <b>Inferior frontal gyrus, pars opercularis</b> | <b>R</b> | <b>24</b> | <b>7.33</b> | <b>51</b> | <b>17</b>  | <b>-1</b> |
| Insula                                          | R        |           | 7.02        | 41        | 27         | -1        |
| Insula                                          | R        |           | 6.31        | 41        | 12         | -1        |
| <b>Young adults</b>                             |          |           |             |           |            |           |
| <b>Inferior frontal gyrus, pars opercularis</b> | <b>R</b> | <b>47</b> | <b>8.48</b> | <b>43</b> | <b>12</b>  | <b>21</b> |
| Inferior frontal gyrus, pars opercularis        | R        |           | 7.08        | 53        | 12         | 18        |
| <b>Superior frontal gyrus</b>                   | <b>R</b> | <b>46</b> | <b>8.28</b> | <b>18</b> | <b>2</b>   | <b>65</b> |
| Middle frontal gyrus                            | R        |           | 6.94        | 31        | -3         | 62        |
| Superior frontal gyrus                          | R        |           | 6.44        | 21        | 12         | 65        |
| <b>Insula</b>                                   | <b>R</b> | <b>75</b> | <b>7.22</b> | <b>43</b> | <b>15</b>  | <b>2</b>  |
| Frontal operculum                               | R        |           | 6.76        | 33        | 25         | 7         |
| Frontal operculum                               | R        |           | 6.53        | 36        | 15         | 10        |
| <b>Supramarginal gyrus</b>                      | <b>R</b> | <b>23</b> | <b>7.21</b> | <b>58</b> | <b>-32</b> | <b>48</b> |

**Table S20.** PPI seed: Right Precuneus [8 -65 29].

| Anatomical structure                      | Hemi     | <i>k</i>   | <i>t</i>    | <i>x</i>   | <i>y</i>   | <i>z</i>  |
|-------------------------------------------|----------|------------|-------------|------------|------------|-----------|
| <b>Older adults</b>                       |          |            |             |            |            |           |
| <b>Insula</b>                             | <b>R</b> | <b>295</b> | <b>9.27</b> | <b>33</b>  | <b>22</b>  | <b>10</b> |
| Inferior frontal gyrus, pars triangularis | R        |            | 9.27        | 53         | 25         | 10        |
| Insula                                    | R        |            | 8.97        | 41         | 25         | -6        |
| Inferior frontal gyrus, pars triangularis | R        |            | 8.79        | 46         | 25         | 4         |
| <b>Supramarginal gyrus</b>                | <b>R</b> | <b>410</b> | <b>9.20</b> | <b>53</b>  | <b>-40</b> | <b>46</b> |
| Angular gyrus                             | R        |            | 9.18        | 56         | -45        | 32        |
| Supramarginal gyrus                       | R        |            | 8.91        | 63         | -42        | 35        |
| Angular gyrus                             | R        |            | 8.72        | 56         | -47        | 48        |
| <b>Middle frontal gyrus</b>               | <b>R</b> | <b>125</b> | <b>8.78</b> | <b>33</b>  | <b>47</b>  | <b>32</b> |
| Middle frontal gyrus                      | R        |            | 8.04        | 41         | 42         | 29        |
| Middle frontal gyrus                      | R        |            | 7.39        | 46         | 45         | 21        |
| <b>Supramarginal gyrus</b>                | <b>L</b> | <b>42</b>  | <b>8.77</b> | <b>-61</b> | <b>-47</b> | <b>32</b> |

## Functional Connectivity Results

|                                                  |          |             |             |            |            |           |
|--------------------------------------------------|----------|-------------|-------------|------------|------------|-----------|
| Supramarginal gyrus                              | L        |             | 6.89        | -54        | -50        | 35        |
| <b>Inferior frontal gyrus, pars orbitalis</b>    | <b>R</b> | <b>61</b>   | <b>8.4</b>  | <b>48</b>  | <b>45</b>  | <b>-6</b> |
| Inferior frontal gyrus, pars triangularis        | R        |             | 8.03        | 51         | 37         | -1        |
| Inferior frontal gyrus, pars triangularis        | R        |             | 7.78        | 48         | 40         | 7         |
| Inferior frontal gyrus, pars triangularis        | R        |             | 7.38        | 41         | 42         | -1        |
| <b>Presupplementary motor area</b>               | <b>R</b> | <b>35</b>   | <b>8.06</b> | <b>4</b>   | <b>7</b>   | <b>60</b> |
| Presupplementary motor area                      | R        |             | 7.44        | 6          | 10         | 68        |
| <b>Inferior frontal gyrus, pars triangularis</b> | <b>L</b> | <b>70</b>   | <b>8.02</b> | <b>-41</b> | <b>17</b>  | <b>7</b>  |
| Inferior frontal gyrus, pars triangularis        | L        |             | 7.85        | -36        | 30         | 4         |
| Inferior frontal gyrus, pars opercularis         | L        |             | 6.84        | -46        | 10         | 7         |
| <b>Superior temporal gyrus</b>                   | <b>R</b> | <b>32</b>   | <b>7.86</b> | <b>53</b>  | <b>-15</b> | <b>-4</b> |
| Middle temporal gyrus                            | R        |             | 7.03        | 56         | -30        | -1        |
| Superior temporal gyrus                          | R        |             | 6.77        | 63         | -20        | -1        |
| <b>Precentral gyrus</b>                          | <b>R</b> | <b>93</b>   | <b>7.85</b> | <b>46</b>  | <b>7</b>   | <b>35</b> |
| Middle frontal gyrus                             | R        |             | 6.89        | 41         | 10         | 46        |
| Middle frontal gyrus                             | R        |             | 6.88        | 41         | 15         | 29        |
| Precentral gyrus                                 | R        |             | 6.82        | 43         | 5          | 26        |
| <b>Inferior frontal gyrus, pars opercularis</b>  | <b>R</b> | <b>21</b>   | <b>7.77</b> | <b>56</b>  | <b>15</b>  | <b>24</b> |
| <b>Angular gyrus</b>                             | <b>L</b> | <b>39</b>   | <b>7.61</b> | <b>-51</b> | <b>-52</b> | <b>48</b> |
| Supramarginal gyrus                              | L        |             | 7.19        | -59        | -47        | 43        |
| <b>Lateral occipital cortex</b>                  | <b>R</b> | <b>29</b>   | <b>7.15</b> | <b>33</b>  | <b>-67</b> | <b>29</b> |
| Lateral occipital cortex                         | R        |             | 6.78        | 26         | -77        | 26        |
| <b>Young adults</b>                              |          |             |             |            |            |           |
| <b>Supramarginal gyrus</b>                       | <b>R</b> | <b>1300</b> | <b>9.69</b> | <b>61</b>  | <b>-45</b> | <b>26</b> |
| Angular gyrus                                    | R        |             | 8.29        | 63         | -47        | 18        |
| Supramarginal gyrus                              | R        |             | 8.28        | 51         | -42        | 13        |
| Supramarginal gyrus                              | R        |             | 8.17        | 58         | -32        | 43        |
| <b>Superior frontal gyrus</b>                    | <b>R</b> | <b>21</b>   | <b>9.35</b> | <b>8</b>   | <b>30</b>  | <b>54</b> |
| <b>Superior frontal gyrus</b>                    | <b>R</b> | <b>185</b>  | <b>9.03</b> | <b>11</b>  | <b>5</b>   | <b>62</b> |
| Superior frontal gyrus                           | R        |             | 8.40        | 16         | 12         | 65        |
| Superior frontal gyrus                           | R        |             | 7.35        | 11         | -10        | 68        |
| Superior frontal gyrus                           | R        |             | 6.78        | 18         | -3         | 73        |
| <b>Insula</b>                                    | <b>L</b> | <b>194</b>  | <b>8.80</b> | <b>-44</b> | <b>10</b>  | <b>-4</b> |
| Insula                                           | L        |             | 7.86        | -46        | 2          | 4         |
| Insula                                           | L        |             | 7.81        | -34        | 2          | 0         |
| Insula                                           | L        |             | 6.91        | -44        | 22         | -6        |
| <b>Precentral gyrus</b>                          | <b>R</b> | <b>79</b>   | <b>8.36</b> | <b>46</b>  | <b>-3</b>  | <b>48</b> |
| Middle frontal gyrus                             | R        |             | 6.85        | 43         | -3         | 57        |
| Precentral gyrus                                 | R        |             | 6.53        | 51         | 2          | 40        |
| Precentral gyrus                                 | R        |             | 6.49        | 33         | -8         | 48        |
| <b>Anterior cingulate cortex, dorsal part</b>    | <b>R</b> | <b>147</b>  | <b>7.97</b> | <b>11</b>  | <b>17</b>  | <b>35</b> |

## Functional Connectivity Results

|                                        |          |            |             |            |            |            |
|----------------------------------------|----------|------------|-------------|------------|------------|------------|
| Anterior cingulate cortex, dorsal part | L        |            | 7.14        | -1         | 5          | 43         |
| Anterior cingulate cortex              | L        |            | 6.79        | -4         | 25         | 24         |
| Anterior cingulate cortex, dorsal part | R        |            | 6.00        | 4          | -5         | 40         |
| <b>Middle temporal gyrus</b>           | <b>R</b> | <b>161</b> | <b>7.92</b> | <b>48</b>  | <b>-60</b> | <b>13</b>  |
| Middle temporal gyrus                  | R        |            | 7.44        | 56         | -52        | 2          |
| Middle temporal gyrus                  | R        |            | 6.88        | 56         | -57        | 10         |
| Middle temporal gyrus                  | R        |            | 6.34        | 43         | -67        | -1         |
| <b>Angular gyrus</b>                   | <b>L</b> | <b>201</b> | <b>7.84</b> | <b>-61</b> | <b>-50</b> | <b>35</b>  |
| Supramarginal gyrus                    | L        |            | 7.80        | -64        | -47        | 26         |
| Supramarginal gyrus                    | L        |            | 7.40        | -64        | -40        | 32         |
| Central operculum                      | L        |            | 6.85        | -59        | -23        | 16         |
| <b>Posterior cingulate cortex</b>      | <b>R</b> | <b>187</b> | <b>7.60</b> | <b>8</b>   | <b>-30</b> | <b>46</b>  |
| Precuneus                              | R        |            | 7.35        | 6          | -42        | 51         |
| Precentral gyrus                       | R        |            | 7.35        | 6          | -18        | 48         |
| Precuneus                              | R        |            | 7.15        | 8          | -57        | 62         |
| <b>Posterior cingulate cortex</b>      | <b>L</b> | <b>24</b>  | <b>7.59</b> | <b>-1</b>  | <b>-25</b> | <b>26</b>  |
| Posterior cingulate cortex             | R        |            | 6.86        | 6          | -28        | 29         |
| <b>Superior occipital gyrus</b>        | <b>L</b> | <b>24</b>  | <b>7.39</b> | <b>-16</b> | <b>-77</b> | <b>43</b>  |
| <b>Lateral occipital cortex</b>        | <b>L</b> | <b>38</b>  | <b>7.34</b> | <b>-31</b> | <b>-82</b> | <b>16</b>  |
| Lateral occipital cortex               | L        |            | 6.37        | -29        | -92        | 18         |
| <b>Cuneus</b>                          | <b>R</b> | <b>31</b>  | <b>7.32</b> | <b>18</b>  | <b>-82</b> | <b>26</b>  |
| <b>Cuneus</b>                          | <b>R</b> | <b>58</b>  | <b>7.30</b> | <b>13</b>  | <b>-75</b> | <b>26</b>  |
| Lateral occipital cortex               | R        |            | 6.51        | 13         | -75        | 46         |
| Cuneus                                 | R        |            | 6.23        | 13         | -75        | 35         |
| Cuneus                                 | R        |            | 6.0         | 8          | -80        | 40         |
| <b>Lateral occipital cortex</b>        | <b>R</b> | <b>61</b>  | <b>7.30</b> | <b>31</b>  | <b>-75</b> | <b>24</b>  |
| <b>Calcarine gyrus</b>                 | <b>R</b> | <b>50</b>  | <b>7.11</b> | <b>1</b>   | <b>-70</b> | <b>13</b>  |
| Lingual gyrus                          | R        |            | 6.44        | 4          | -80        | 2          |
| Intracalcarine cortex                  | L        |            | 6.38        | -6         | -75        | 18         |
| <b>Postcentral gyrus</b>               | <b>L</b> | <b>20</b>  | <b>6.74</b> | <b>-9</b>  | <b>-47</b> | <b>57</b>  |
| Precentral gyrus                       | L        |            | 6.33        | -14        | -37        | 43         |
| <b>Fusiform gyrus</b>                  | <b>R</b> | <b>24</b>  | <b>6.67</b> | <b>36</b>  | <b>-67</b> | <b>-15</b> |
| Fusiform gyrus                         | R        |            | 6.66        | 28         | -72        | -12        |
| <b>Middle frontal gyrus</b>            | <b>R</b> | <b>23</b>  | <b>6.51</b> | <b>31</b>  | <b>40</b>  | <b>26</b>  |
| Middle frontal gyrus                   | R        |            | 6.22        | 41         | 42         | 29         |

## Functional Connectivity Results

### Result Tables for functional connectivity

**Table S21.** Results for linear model for within and between network connectivity.

| PPI variable                   | FC                     | IV        | <i>b</i> | <i>SE</i> | <i>t</i> | <i>p</i>          |
|--------------------------------|------------------------|-----------|----------|-----------|----------|-------------------|
| Semantic fluency ><br>Counting | Within MDN             | Intercept | 0.05     | 0.02      | 2.70     | <b>0.009</b>      |
|                                |                        | Age       | 0.005    | 0.03      | 0.18     | 0.85              |
|                                | Within DMN             | Intercept | -0.002   | 0.02      | -0.07    | 0.95              |
|                                |                        | Age       | 0.02     | 0.03      | 0.50     | 0.63              |
|                                | Between MDN<br>and DMN | Intercept | 0.10     | 0.02      | 4.47     | <b>&lt; 0.001</b> |
|                                |                        | Age       | 0.04     | 0.03      | 1.25     | 0.22              |

Significant effects are marked in bold:  $p < M_{eff}$ -corrected  $\alpha$  of 0.018; FC Functional connectivity; IV Independent variable; MDN Multiple-demand network; DMN Default-mode network.

**Table S22.** Results for generalized linear mixed models for within- and between-network functional connectivity effects, age, and condition on accuracy and response time.

| Coefficient                     | Accuracy |                 |                   | Response time |                 |                   |
|---------------------------------|----------|-----------------|-------------------|---------------|-----------------|-------------------|
|                                 | Log-Odds | Conf. Int (95%) | <i>p</i>          | Estimates     | Conf. Int (95%) | <i>p</i>          |
| Intercept                       | 3.09     | 2.48 – 3.70     | <b>&lt; 0.001</b> | 6.53          | 6.48 – 6.58     | <b>&lt; 0.001</b> |
| Within-MDN<br>FC                | -0.06    | -1.68 – 1.55    | 0.849             | -0.15         | -0.30 – 0.00    | 0.234             |
| Within-DMN<br>FC                | -0.37    | -1.93 – 1.18    | 0.621             | -0.33         | -0.50 – -0.16   | <b>&lt; 0.001</b> |
| Between-<br>network FC          | 0.25     | -1.51 – 2.01    | 0.829             | 0.53          | 0.36 – 0.70     | <b>&lt; 0.001</b> |
| Age                             | -0.01    | -0.17 – 0.16    | 0.866             | 0.07          | 0.05 – 0.08     | <b>&lt; 0.001</b> |
| Within-MDN<br>FC * Age          | 1.55     | -1.53 – 4.63    | 0.329             | 0.98          | 0.65 – 1.31     | <b>&lt; 0.001</b> |
| Within-DMN<br>FC * Age          | 2.10     | -0.74 – 4.93    | 0.151             | 0.90          | 0.62 – 1.19     | <b>&lt; 0.001</b> |
| Between-<br>network FC *<br>Age | -2.58    | -5.59 – 0.43    | 0.096             | -0.80         | -1.11 – -0.49   | <b>&lt; 0.001</b> |

#### Random Effects

|            |      |      |
|------------|------|------|
| $\sigma^2$ | 3.29 | 0.13 |
|------------|------|------|

## Functional Connectivity Results

|                                                            |               |               |
|------------------------------------------------------------|---------------|---------------|
| $\tau_{00}$                                                | 0.22 Subj     | 0.01 Subj     |
|                                                            | 1.71 Category | 0.00 Category |
| ICC                                                        | 0.37          | 0.12          |
| N                                                          | 58 Subj       | 52 Subj       |
|                                                            | 20 Category   | 20 Category   |
| Observations                                               | 9837          | 9675          |
| Marginal R <sup>2</sup> /<br>Conditional<br>R <sup>2</sup> | 0.002 / 0.371 | 0.027 / 0.143 |

Significant effects are marked in bold. Contrasts are sum coded. P-values were obtained via likelihood ratio tests. Conf. Int. Confidence interval.

**Table S23.** Results of post-hoc tests for two-way interactions Age x Connectivity measure for response time model. P-values are Bonferroni-corrected.

| Contrast | FC                     | Estimate | SE  | df  | Conf. Int (95%) | z     | p              |
|----------|------------------------|----------|-----|-----|-----------------|-------|----------------|
| OA – YA  | Within MDN             | 661      | 116 | Inf | 434 – 887       | 5.72  | < <b>0.001</b> |
|          | Within DMN             | 602      | 100 | Inf | 405 – 799       | 6     | < <b>0.001</b> |
|          | Between MDN<br>and DMN | -524     | 110 | Inf | -739 – -308     | -4.76 | < <b>0.001</b> |

Significant effects are marked in bold. FC functional connectivity; SE standard error; df degrees of freedom; Conf. Int confidence intervals.
